# Supplementary material
Source: publisher figshare collection journal article supplement (https://sage.figshare.com/ndownloader/files/13247567)
Supplement: Supplementary file 1 [file 13247567]

**Prevención del crimen y ‘la coproducción de la seguridad’: los alcances de la participación ciudadana en el nivel territorial del Chile neoliberal**

María Paz Trebilcock y Alejandra Luneke

*Introducción*

Con la dictadura militar de Pinochet, en Chile se implementó una intensa agenda política y económica que fue la base del actual sistema neoliberal. Diversas áreas fueron abiertas a actores privados y a la racionalidad y lógica del libre mercado. Los gobiernos democráticos desde 1990 han aplicado numerosas fórmulas para corregir las consecuencias del modelo económico, pero las bases y fundamentos del sistema permanecen hasta hoy. En esta trayectoria, la seguridad pública también ha sido un ámbito intervenido por la racionalidad neoliberal[[1]](#endnote-2). Y es que, desde mediados de los años noventa y frente al alza de delitos comunes, los gobiernos de centro izquierda iniciaron una serie de reformas orientadas a mejorar el sistema de justicia criminal y penal. Sin embargo, el cambio más paradigmático lo ha constituido el llamado que se ha hecho a la ciudadanía para participar en la provisión de la seguridad en el ámbito de lo local y la instalación de una intensa agenda de participación ciudadana para la prevención del delito; lo que se busca es que las comunidades tengan un rol activo en la provisión de la seguridad de sus hogares y vecindarios, ya sea de manera individual o de manera asociativa. En Chile, estas iniciativas han buscado aumentar la vigilancia y el control de conductas y espacios públicos, promoviendo el prudencialismo en la vida cotidiana (Bell, 2006).

La incorporación de la ciudadanía en la provisión de la seguridad ha sido ampliamente analizada por la criminología crítica. Garland (2000, 2005), O’ Malley y Hutchinson (2007), entre otros, han abordado estas políticas a partir de los experimentos neoliberales de Thatcher y Reagan en Inglaterra y Estados Unidos, señalando que la prevención del delito y el llamado a la comunidad son la cara neoliberal del control social en la sociedad contemporánea. Sozzo (2000), ha dado cuenta de estos procesos y ha analizado cómo la agenda de la participación ciudadana en la prevención del delito se configura bajo los procesos de consolidación de las democracias neoliberales en América latina.

Sin embargo, un fenómeno que ha sido menos abordado por esta literatura refiere al cómo se articula e imbrica este llamado a la ciudadanía en contextos caracterizados por el debilitamiento de los vínculos sociales, por altos niveles de desconfianza hacia las instituciones y por bajos niveles de involucramiento de sujetos y familias en actividades comunitarias ¿Cuál ha sido la política de co producción de seguridad en Chile en las últimas décadas?¿cuáles son los alcances del llamado a la ciudadanía en territorios donde la asociatividad y los vínculos sociales están desafiados tanto por la desconfianza a las instituciones y la desconfianza interpersonal?¿qué tipo de respuestas ciudadanas se producen?

Este artículo busca responder estas preguntas y con ello contribuir al debate que ha levantado la escuela crítica en torno a estas estrategias del control social en regímenes neoliberales. La tesis que desarrolla esta investigación es que el llamado a la co-producción de seguridad que han hecho los gobiernos post transicionales como estrategia de control de la seguridad y el delito en el territorio, posee un fundamento asociativo que no necesariamente se cumple en una sociedad con déficit de participación y confianza y que se agudiza en el marco de los procesos de individuación que caracterizan a la sociedad neoliberal.

El análisis se sitúa en el Chile actual en un territorio específico: la comuna de Cerrillos en el Gran Santiago. Esta comuna, al igual que otras 100 comunas urbanas del país, ha promovido diversos esquemas de participación ciudadana y busca fomentar el involucramiento de sujetos y familias en la provisión de la seguridad en los territorios.

Este artículo se basa en una investigación de carácter cualitativo que involucró el desarrollo de 15 grupos focales en diferentes barrios de la comuna. En estos participaron hombres y mujeres entre 18 y 65 años residentes de la comuna. Los grupos focales se realizaron entre el 7 de septiembre y 15 de octubre del año 2015. Los audios fueron transcritos y analizados utilizando el software NVIVO 11. Esta información fue complementada con datos secundarios de la Encuesta de Caracterización Socioeconómica (CASEN), aplicada el año 2013; la Encuesta Nacional de Seguridad Ciudadana (ENUSC) de 2015 e información contenida en diversos documentos comunales y nacionales relacionados al ámbito de la seguridad.

A continuacion y a modo de contexto, se entrega una breve descripción de la comuna de Cerrillos, para luego dar cuenta de cuáles son las iniciativas concretas que materializan este llamado a la comunidad y del contexto de alta desconfianza a las instituciones del control de delito. En la siguiente parte se analizan los alcances de esta agenda en un contexto de debilitamiento del tejido comunitario y de privatización de todas las esferas de la vida cotidiana. A modo de conclusiones, se retoman las ideas principales y se debate sobre los desafíos políticos y sociales que impone el llamado que se ha hecho en Chile a la ciudadanía en el ámbito de la seguridad.

*1.- La agenda de prevención del delito y el llamado a la participación ciudadana*

Chile se caracteriza por tener una brecha importante entre victimización e inseguridad. Al contrario de otros países de la región, según la UNODC (2013) la tasa de homicidios en Chile para el año 2012 fue de 3,6 homicidios cada 100 mil habitantes, mucho más bajo que los 7,6 promedio de la región. Junto con ello, los datos de Encuesta Nacional Urbana muestran que la victimización en los hogares ha caído de un 40,1% en 2003 a un 26,4% en 2015 (ENUSC, 2015). No obstante ello, existe una fuerte percepción de inseguridad, tema que está en el centro de las preocupaciones a nivel país. Según datos de la misma fuente, un 86,8% de los chilenos cree que la delincuencia aumentó durante el último año, cifra que fue mayor en 6,9 puntos porcentuales al año anterior. En relación a la exposición al riesgo, un 41,3% de los chilenos cree que será víctima de un delito en los próximos doce meses, cifra por cierto mucho más alta que aquellos sujetos que declararon haber sido víctimas de algún delito en el último año (la victimización personal para 2015 fue de 9,7%.). Esta tendencia no ha sido aislada y en los últimos años se ha ido observando un incremento de la importancia que se asigna a la delincuencia como principal problema del país. Así, y si en el Chile post dictadura, el 40,7% de los ciudadanos consideraba que la delincuencia era el principal problema país (CEP, 1990), según la misma fuente, en la actualidad esta cifra llega al 52% y se constituye como el principal problema en Chile (CEP, 2016).

Como respuesta a esta demanda y a la intensa agenda mediática que existe en Chile en torno al crimen, desde la transición democrática, la respuesta pública no sólo se ha basado en la implementación de una serie de reformas orientadas a mejorar el sistema de justicia criminal y de control -con un incremento sostenido del gasto público en dicho ámbito-[[2]](#endnote-3) sino que también se ha diversificado y ha incorporado a diversos actores en lo que se ha llamado la ‘co producción de la seguridad’ (Política Nacional de Seguridad Ciudadana, 2004). Como destaca Blanco y Tudela (2010), esta agenda ‘reconoce que la violencia y la criminalidad son fenómenos multidimensionales sobre el cuál inciden una multiplicidad de factores y por lo cual, son diferentes los actores llamados a dar respuesta al fenómeno’ (Blanco y Tudela, 2010). Además, destaca que el sólo control del delito por parte del estado no basta y que la prevención del delito es una condición de éxito en esta tarea. Conceptos como el de ‘co-responsabilidad’, ‘co-producción’ y ‘participación ciudadana’ se han hecho parte del discurso: “Un componente común ha sido la convicción de que la prevención del delito es posible en tanto se asume la ´coproducción’ como principal criterio de actuación (responsabilidad compartida, cooperación de diversos actores, fruto de la actuación conjunta y coordinada de diversos actores) y la gestión integral como directriz fundamental (causas, manifestaciones y efectos)” (Blanco y Tudela; 2010:5).

En este debate, el estado ha asumido un rol de promotor y facilitador de estrategias orientadas a prevenir la criminalidad, a intervenir en aquellos grupos y territorios en riesgo al delito y a disminuir la oportunidad de ella (prevención situacional y vigilancia policial).

En este contexto, se ha llamado a la ciudadanía a tomar un rol activo en la provisión de su propia seguridad en los vecindarios. Como destaca Dammert, ‘hasta fines de los años noventa las medidas de seguridad centraron siempre en mejorar la gestión policial, en definir un marco de acción democrático y en responder de manera específica a robos, etc., pero ello cambia en las últimas décadas’ (Dammert, 2005:133). Esto queda en evidencia en las palabras del Vice ministro de interior del gobierno de Ricardo Lagos, Jorge Burgos: “Entendemos claramente la separación entre la prevención social del delito y la prevención policial (…). La seguridad ciudadana es el resultado de la acción de los diversos órganos del Estado y diferentes sectores de la sociedad en el marco de una política pública que necesariamente debe incluir la participación ciudadana” (Burgos, J.; Tudela, P.; 2010).

Lo anterior también se corrobora al analizar los tres últimos programas de gobierno que se han impulsado desde 2006 en adelante, (administración de Lagos, Bachelet, Piñera y Bachelet (en su segundo período) confirmándose el rol que se ha asignado tanto a la prevención del delito como las estrategias de gestión territorial que promueven la participación de diversos actores y en específico, de las comunidades. En este debate, el estado asume un rol de promotor de estrategias orientadas a prevenir la criminalidad, a intervenir en aquellas áreas que se orientan a la interrupción de las carreras criminales (población en riesgo) y a disminuir la oportunidad de ella (prevención situacional y vigilancia policial).

INSERTAR TABLA 1

Respecto a estos cambios, Dammert y Lunecke (2004) identifican de manera general tres formas bajo las cuales ha sido abordada la comunidad por las políticas públicas en la seguridad. La primera considera a la comunidad como un factor de protección, contención y barrera del deterioro social. El supuesto o teoría que se encuentra detrás de esta forma, es la de la desorganización social. Y es que la criminalidad es comprendida como resultado del fracaso de la convivencia y de la vida comunitaria. Bajo esta perspectiva, se fortalece el tejido comunitario, se fomenta el capital social y lo que se ha denominado la ‘eficacia colectiva’ y que refiere a la capacidad de una comunidad de frenar el deterioro de su barrio: contener las conductas desviadas y por ello se busca fortalecer el tejido comunitario. Una segunda forma que adquiere este llamado a la comunidad es la que la considera como mecanismo de control social informal, un mecanismo sensor de conductas desviadas. Bajo este supuesto, la criminalidad se explica por la falta de control y vigilancia, y por tanto las tareas se orientan a crear comités de vigilancia entre vecinos y a promover el conocimiento entre los mismos y por tanto se busca homogeneizar la información en la comunidad, así como a disuadir al posible agresor debido a que aumentan las posibilidades de ser sancionado. Una tercera forma se relaciona con la idea de que la comunidad es un territorio sobre el cual se interviene y trabaja y que presenta características particulares que explican la prevalencia de hechos de violencia y criminalidad allí.

Esta trayectoria coincide con la experiencia anglosajona analizada por Garland (1996, 2000 y 2005) para las administraciones conservadoras de Reagan y Tatcher, y por Sozzo (2009) para Latinoamérica, quienes comparten la idea de que la prevención del delito constituye la agenda neoliberal del control en las sociedades contemporáneas. Garland señala que este proceso de incorporación de nuevos actores a la provisión de la seguridad, y especialmente de los ciudadanos se vincula a una serie de reajustes políticos y culturales que han modificado la manera de pensar y reaccionar de los gobiernos y de los ciudadanos con respecto al crimen. Señala el autor que las estrategias de prevención del delito y de asistencia a víctimas del delito, constituyen tecnologías del estado orientadas a aumentar el rol de sujetos y vecindarios en la provisión de seguridad (Garland, 2005). En un sentido similar, para O’ Malley y Hutchinson (2007) señalan que “estas prácticas se inscriben en la lógica preventiva de los Estados y que se ha instalado bajo una lógica de gobernanza pública neo liberal, entregando mayor participación a terceros en la provisión de la seguridad” (O´ Malley; Hutchinson, 2007: 373). Para Johnston (2001), quien analiza estos esquemas en Estados Unidos, estas experiencias son regímenes de seguridad urbana a través de los cuales las personas traducen el discurso político sobre el delito en sus vidas cotidianas y producen actos rutinarios de auto gobierno de la seguridad. Estos ‘regímenes seguritarios’, para el autor son el producto de dos fuerzas: la inseguridad que produce la modernidad tardía y las nuevas formas de producción de seguridad que tienen los estados de las democracias occidentales, que promueven nuevos esquemas de una gobernanza neo liberal. Por tanto, el rol de estas políticas neoliberales, es servir de herramientas políticas que dependen de maneras de maneras de pensar (racionalidades) y de formas de actuar (tecnologías) permitiendo el control – más invisible- territorios y a la población por parte del estado” (Lee, 2007:11).

En la experiencia chilena, y a diferencia de la anglosajona, los esquemas de participación comunitaria en materia de seguridad se enmarcan en lo que han sido las políticas de participación de los gobiernos democráticos de centro izquierda en éste y en otros ámbitos del quehacer público[[3]](#endnote-4) en miras de movilizar a la ciudadanía tras diecisiete años de dictadura militar. Y es que, esta decisión se inscribió en los procesos políticos de reorganización del vínculo Estado- ciudadanía, la que buscaba generar lazos de solidaridad y colaboración que permitieran avanzar en una agenda de modernización nacional (Leiva, 2008), pero sin poner en cuestionamiento las bases (métodos y estructuras) del modelo neoliberal. En dicho contexto, cobró importancia el acoger nuevas formas y estructuras de gobernanza que implicaban el fortalecimiento de la sociedad civil y la entrega de derechos orientados a generar los mecanismos de cooperación entre el estado y los ciudadanos. (Hale, 2008).

Dentro de estos esquemas, los más extendidos territorialmente durante los últimos veinte años se inspiran en los modelos anglosajones analizados por dichos autores, como son: ‘neighborhood watch’, los ‘local safety councils’, ‘community policing’, ‘problem oriented police’ entre otros. Así, ya desde 1993 se han creado diversos programas de seguridad vecinal, comités de vigilancia y protección barrial (Dammert, 2003) y comisiones municipales de seguridad ciudadana (Sandoval, 2001). En la actualidad, un esquema que se ha diversificado en diversos territorios es el de las ‘alarmas comunitarias’[[4]](#endnote-5) y los ‘sistemas de cámaras de vigilancia para sectores comerciales’.

También son extendidos los esquemas de coaliciones locales de seguridad (Crawford, 1994) en esta agenda, los que, mediante la aprobación de la Ley de Consejos comunales de Seguridad pública en 2015, obliga a los municipios a constituir consejos locales en diversos territorios urbanos. Inspirados en la experiencia británica de Safer Cities Programme, estas iniciativas buscan establecer una instancia de gobernanza de la seguridad en los territorios locales en los cuales diferentes actores- incluidos representantes de la ciudadanía local y la policía- definen e implementan estrategias de prevención del delito y la violencia. Bajo este enfoque de trabajo, se han implementado el Programa Comuna segura- compromiso cien (2001-2006), el programa Planes comunales de seguridad pública (2006- 2010) y los Consejos municipales de seguridad pública (2014-2017) (Lunecke, 2014).

Un tercer tipo de esquema refieren a los implementados por la policía de carabineros desde 2000 en adelante y que buscan una mayor vinculación con la comunidad. Destacan entre estos las iniciativas desarrolladas en el marco del Plan Cuadrante de Seguridad Preventiva (en implementación desde 1999 para comunas urbanas del país) y cuya metodología busca mejorar la eficacia y eficiencia de la vigilancia policial en el territorio a través del vinculo con la ciudadanía y específicamente con la comunidad organizada, entendida esta como socio colaborativo en la identificación de los problemas (acceso a información relevante para esclarecimiento de casos policiales).

Así, estas experiencias constituyen una nueva forma de gobernar la seguridad en los territorios, en la cual la ciudadanía es un pivote central. En estos esquemas participativos, el control del delito deja de ser visto como una tarea exclusiva de las instituciones de justicia criminal y se concibe como una responsabilidad distribuida en diversas instituciones del estado, ONGs y de la población organizada, desarrollo que ha sido explicado como una respuesta del estado frente al aumento de la percepción de inseguridad y en un contexto de alta desconfianza ciudadana en policías y sistemas de justicia en general (Dammert, Lunecke, 2004). Ello en un contexto en que se buscaba fomentar la participación de la ciudadanía en este y en otros ámbitos de la gestión territorial de las políticas públicas post dictadura militar.

*2. El contexto: la comuna de Cerrillos, territorio de vulnerabilidad e inseguridad.*

La comuna de Cerrillos es una de las 32 comunas que componen la ciudad de Santiago en Chile. Está localizada en el pericentro urbano en el sector poniente de la capital y posee 85.343 habitantes (INE, 2015).

Cerrillos se caracteriza por ser una comuna de clase media- baja. Los datos de la encuesta Nacional de Caracterización Socioeconómica (CASEN) del año 2013, dan cuenta que la población de la comuna se concentra en el segundo y tercer quintil de ingreso.

INSERTAR TABLA 2

El 43,7% de los hogares de la comuna posee jefatura de hogar femenina, la cual se concentra en los quintiles más pobres de ingreso. El 47% de los jefes de hogar no posee educación media completa, en relación al 41% de la Región. El 53,9% de los mayores de 18 años se encuentra ocupado, mientras que el 2,9% está desocupado. La principal actividad de los ocupados es la actividad comercial con un 23,2% de los ocupados, seguida por la manufactura con un 19,9%.

Así, y en términos socioeconómicos Cerrillos se caracteriza por ser una comuna bastante promedio dentro de la Región Metropolitana, que no se caracteriza por un nivel extremo de pobreza y vulnerabilidad, pero tampoco por ser de los grupos de mayores ingresos. Esto implica que existe una fuerte dependencia de los fondos municipales para su desarrollo, sobre todo en educación que ocupa el 38,5% del presupuesto municipal (SINIM, 2014).

En términos sociodemográficos, la población presenta un aumento en la representación de los segmentos de adulto mayor sobre 75 años que pasó de un 5,5% a un 6,2% según datos censales, lo que implica que es una población en proceso de envejecimiento y que es un elemento clave en la percepción de inseguridad, como se verá más adelante.

En términos de estadísticas de seguridad, la comuna de Cerrillos se caracteriza por un aumento en la frecuencia de los delitos para el año 2013/2014, tal como se muestra en el siguiente gráfico

INSERTAR GRÁFICO 1

En efecto, son los delitos de droga y ley de armas las que presentan un mayor aumento con un 65,3% y 56,1% respectivamente, no obstante, es importante relevar que en ambos casos ha existido una campaña nacional de mayor control y menor tolerancia a este tipo de delito (Ministerio del Interior, 2015).

Pero lo que llama más la atención, es que la comuna de Cerrillos se caracteriza por tener una brecha relevante entre el sentimiento de inseguridad y la victimización efectiva que tienen sus habitantes. Si bien este comportamiento es coincidente con lo que sucede en la Región Metropolitana, existe una diferencia estadísticamente significativa con el comportamiento de inseguridad, dando cuenta de que la brecha es mayor en la comuna, tal como se muestra en el siguiente gráfico.

INSERTAR GRÁFICO 2

Al ser consultados por los principales problemas, la victimización vicaria es un elemento presente en los discursos de los vecinos, quienes mencionan conocer directamente a vecinos o familiares que han sido víctima de la delincuencia. Un vecino de un barrio de la comuna da cuenta de ello: *“A mi hijo lo asaltaron y le dieron 3 puñaladas, fue como a las 11 de la noche. En Departamental, en la punta de diamante estaban los delincuentes” (Focus Group, Villa Buzeta, 7 septiembre)*

Pero también la inseguridad se asocia al consumo de droga y la violencia que se da en las calles *“Es peligroso, cerca de la José María Caro, todos los fines de semana hay balazos, peleas de la ‘Garra Blanca’ con los de ´la U’ (barras bravas[[5]](#endnote-6))” (Focus Group, Cerrillos, 28 septiembre, Líderes del Consejo)*

*3. La respuesta local: los esquemas de participación ciudadana y la crisis de confianza ciudadana en las instituciones.*

Siguiendo una trayectoria similar al contexto nacional, las respuestas institucionales recaen en las instituciones de control (policías, ministerio público, justicia) y en la municipalidad,[[6]](#endnote-7) las que bajo diversos esquemas han llamado a la ciudadanía para cumplir un rol clave en la provisión de seguridad en los barrios.

Una forma en la que se materializa este llamado, es por medio de una serie de programas dependientes de diferentes instancias centrales de gobierno, que buscan aportar a la prevención y control de la delincuencia. Dentro de estos programas se encuentran: Barrio en Paz[[7]](#endnote-8), Previene[[8]](#endnote-9), Unidad de Justicia Vecinal[[9]](#endnote-10), Quiero Mi Barrio “Oreste Plath”[[10]](#endnote-11), 24 horas[[11]](#endnote-12), Oficina de protección de Derechos de la Infancia y Adolescencia (SENAME)[[12]](#endnote-13), entre otros.

Una segunda estrategia ha sido la puesta en marcha de un Consejo de Seguridad Pública, que es un organismo multisectorial, de carácter técnico- resolutivo, que cuenta con miembros del municipio (alcalde y concejales), las policías (PDI y Carabineros), la Fiscalía y Representantes del Consejo de Organizaciones Civiles de la comuna. Este consejo que posee como principal objetivo establecer medidas para la prevención del delito, en la práctica cuenta con dos representantes de organizaciones comunitarias y los demás miembros pertenecen al entorno institucional. Esta política emana del gobierno central por lo que se replica en otras comunas. Su objetivo es contar con una mesa de control local que permita la coordinación territorial para adoptar medidas en materia de seguridad. Ligado a este consejo, se han constituido los COVES o comités de seguridad vecinal, que son instancias de participación vecinal que promueve el municipio para el diseño de estrategias orientadas a la prevención del delito. En la práctica las acciones impulsadas por los COVES han tenido que ver con el desarrollo de diagnósticos sobre la situación de cada uno de los barrios y como medidas se han tomado son: desarrollar *alarmas comunitarias[[13]](#endnote-14)*, colocar cámaras de tele vigilancia y establecer un sistema de vehículos municipales de vigilancia (COVES; 2015).

Una tercera estrategia de participación ciudadana es la que implementa la policía de preventiva[[14]](#endnote-15). Al igual que en las otras comunas urbanas del país, Carabineros de Chile (policía preventiva), implementa desde el año 2000 el Plan Cuadrante de seguridad preventiva, que es una metodología de trabajo que divide al territorio comunal en cuadrantes, basándose en información socio delictual con el fin de establecer el número de rondas y de patrullajes necesarios según la concentración de problemas en el territorio. Inspirados en modelos de policía orientada a problemas y policía comunitaria, se trabaja de manera estrecha con líderes vecinales y otros actores en miras de hacer diagnósticos sobre cada micro realidad local. El principal interés de esta convocatoria es acceder a información certera sobre los problemas y con ello definir estrategias de inteligencia y de prevención policial. Para ello, cada cuadrante cuenta con dos delegados policiales, quienes visitan a las organizaciones sociales y se reúnen con ellos en búsqueda de esta información. Dicha información luego es procesada en cada unidad policial (comisarías) y se convierte en procedimientos policiales específicos *“su finalidad es contribuir a la disminución del delito y aumentar la sensación de seguridad, haciendo énfasis en la relación directa ciudadanía-carabinero para el intercambio de información de interés policial”* (Carabineros de Chile, 2011).

Sin embargo, el diseño e implementación de estas estrategias se enmarcan en un contexto local en el cual las instituciones a cargo de esta problemática se encuentran cuestionadas por los ciudadanos. La prevalencia delictual en el país, pero sobre todo el alto sentimiento de inseguridad de los habitantes se imbrica con la mala evaluación y desconfianza que reciben las instituciones del sistema de justicia criminal, como son los tribunales de justicia, el ministerio público, la policía y el gobierno nacional y local en este ámbito.

En efecto, de acuerdo a la reciente encuesta de Evaluación del sistema judicial de 2016, un 55% de los ciudadanos declara estar nada satisfecho con el sistema judicial, un 59% considera que está peor que hace 10 años y posee escasa confianza en las instituciones que componen el sistema judicial[[15]](#endnote-16). La percepcion ciudadana considera que gran parte de la delincuencia responde a un sistema judicial que posee escasa efectividad: según datos de la encuesta un 33,3% percibe que la ley no contempla sanciones más duras para los delincuentes, un 32,1% considera que las sanciones que los jueces aplican a los delincuentes son débiles; un 20,5% lo asocia a falta de vigilancia policial (Centro de Estudios Longitudinales UC, 2016). Asimismo, los datos que entrega el Indice de Victimización de Fundación Paz Ciudadana, muestra que las notas de evaluación ciudadana (en una esacla de 1 a 7) a todas las instituciones del sistema de justicia criminal han bajado entre junio de 2011 y octubre de 2015. Así por ejemplo, la nota 5,2 que recibía Carabineros en 2011 cae a 4,1 en 2015; la nota de 3,8 que recibía el Ministerio Publico cae a 2,9 y nota de 3,4 que recibieron los jueces cinco años atrás, cae a un 2,4 en 2015 (FPC, 2016). Estos indicadores muestran como en los últimos años se ha empeorado la evaluación ciudadana al del sistema de justicia criminal.

Coincidentemente con la percepción nacional, los vecinos de Cerrillos no ven que exista una respuesta efectiva a nivel de las instituciones en materia de delincuencia, más bien lo que impera es una fuerte desconfianza en ellas.

*“¿Qué pasa con carabineros? ¿Por qué hacen la vista gorda con estas cosas? Frente al consultorio hay tráfico por años. Nosotros como población estamos abandonados por carabineros, la comisaria tiene 6 furgones y ¿dónde están? Cuando uno los llama, no llegan nunca” (Focus Group, Villa Las Torres, 15 de septiembre)*

También a nivel macro, existe una profunda desconfianza del sistema judicial y su efectividad, lo que limita el apoyo de los vecinos a la gestión anti delincuencia.

*“Está mal todo lo que es el gobierno. La ley…Roban y se los llevan presos y los dejan libre a los días…Ahora tiene más derecho el delincuente que el afectado…” (Focus Group, Villa Los Presidentes, 25 de septiembre).*

Esta desconfianza radical en el gobierno y su capacidad de gestionar la delincuencia en el territorio, se asocia con la imagen que los vecinos forjan de las policías y en los comportamientos que ellos adoptan para protegerse de lo que consideran peligroso en el sector. El análisis de los grupos focales realizados da cuenta que un primer grupo de vecinos ve con recelo a la policía, que se manifiesta en temor a generar denuncias porque al tener un sistema judicial que no funciona, los delincuentes –muchas veces vecinos- quedan libres y llevan a cabo fuertes represalias con quienes los denunciaron. Tampoco existe un sistema efectivo de protección a los testigos y se percibe que muchas veces son los mismos policías quienes entregan información sobre los denunciantes.

*“… hice la denuncia a carabineros, pero el tipo (microtraficante) me fue a encarar. Entonces…hoy día se perdió la confianza en la policía, es importante y una realidad…” (Focus Group, Villa Gabriela Mistral, 24 de septiembre)*

Asimismo, esa desconfianza en el funcionamiento del sistema traspasa al funcionamiento mismo de la policía. Los vecinos ven con desconfianza el actuar de las policías ya que se percibe que no existe un verdadero trabajo por parte de la policía para frenar la delincuencia.

*“…el carabinero me dijo ‘mira, nosotros llenamos todos los días papeles de asaltos y no queda en nada’. Y dije que sabía, pero que por último que haya constancia que de nuevo están asaltando en la pasarela y son las 14 de la tarde. Hace un tiempo ponían a un carabinero en la mañana y en la tarde” (Focus Group, Portal Oeste, 16 de septiembre)*

A esto se suma la sensación de desconfianza por una ausencia de presencia policial en las calles, la demora en las llamadas para atender los delitos la que genera un malestar de los vecinos con el actuar policial.

*“…Y cuando los llaman (a carabineros), ¿vienen?*

*No, es como llamar a la ambulancia…Tuvimos una reunión y se armó una tole- tole (pelea) y nunca llegaron” (Focus Group, Villa Los Presidentes, 25 de Septiembre)*

Todo ello se asocia a una fuerte sensación de desprestigio de la institución en la comuna que se manifiesta por medio de la percepción de que hay una degradación de la policía en el sector, en el sentido de ser “malos policías” que se prestan para la corrupción y el encubrimiento de la delincuencia.

*“…la mayoría de carabineros de Cerrillos, no todos, pero la mayoría son corruptos, en vez de estar trabajando están tomando. Pero eso desde siempre ah, pero hoy día está más visible y lo sabemos porque los vecinos hablamos. Si pero antiguamente no tomaban así” (Focus Group, Villa Fantuzzi, 2 de Septiembre)*

Pero no sólo la policía goza de una imagen negativa. El municipio, a quien se le confiere una labor más bien preventiva, tampoco es bien evaluado en materia de gestión de la seguridad cotidiana. Los esfuerzos municipales recaen más bien en el personalismo del alcalde, pero no existe una noción de equipo a cargo de combatir la delincuencia.

*“El alcalde trabaja bien. Los que quedaron ahí trabajan mal” (Focus Group, Villa Buzeta, 7 de septiembre)*

Tampoco se ve que exista una política desarrollada por el municipio y que permita gestionar la seguridad. Esto se manifiesta en que las acciones desarrolladas por el municipio se ven como aisladas y sin una planificación a largo plazo. Y es que, a nivel de la gestión territorial, los vecinos perciben que existe una descoordinación entre las instituciones que no logran generar planes comunes para hacer frente a la delincuencia que emerge en la comuna.

*“No hay comunicación del barrio con la municipalidad. En la esquina hay un departamento de seguridad ciudadana y no se sabe nada. Es la presencia municipal, pero que significa para nosotros (Focus Group, Villa México, 3 de septiembre)*

Y tampoco se confía en los líderes locales tradicionales, de quienes se percibe que han aprovechado para fines personales los fondos comunales.

*“Hay un desencantamiento de los dirigentes apernados, se dedican a lucrar en la feria navideña. Las nuevas directivas somos transparentes. Nos conseguimos donaciones” (Entrevista Dirigente Vecinal, Villa Oreste Plath, 14 de septiembre)*

Estas opiniones dan cuenta de la desconfianza que manifiestan los habitantes de Cerrillos respecto a la respuesta pública existente en torno a la delincuencia y evidencian la crisis de legitimidad ciudadana por la cual atraviesan estas instituciones a cargo del control y prevención del delito en la comuna. Cifras que- y como se ha señalado antes en base a otras fuentes de información- coinciden con la falta de legitimidad que gozan las instituciones a cargo de la delincuencia en el nivel país. En efecto, la encuesta de Cohesión Social 2014, muestra que la institución que goza de mayor confianza es carabineros, sin embargo, sólo tiene un 41% de menciones positivas (COES, 2014)

Pero esta des legitimidad de las instituciones no sólo se explica por la pérdida de confianza en la eficiencia y eficacia de las instituciones, sino que también en el marco de una ciudadanía que percibe que la medida del logro es el esfuerzo individual, tal como lo expresa el Informe de Desarrollo Humano en Chile de 2015: “hay una especie de desesperanza adaptativa que revela un aprendizaje doloroso: el único sostén de la propia vida es el esfuerzo personal, el trabajo cotidiano, el sacrificio diario (…). Junto con la alta valoración del esfuerzo personal en la solución de los problemas comunes, la responsabilidad de construir una biografía parece residir solamente en el individuo (…). Las citas anteriores son sintomáticas no sólo de una imagen e identidad personal, sino que expresan el impacto del proceso de individuación en la sociedad chilena… (PNUD, 2015:118)

Dammert, 2003 ha señalado que, frente al fracaso percibido del sistema de justicia criminal para responder a este sentimiento, los gobiernos han llamado a la comunidad a participar activamente en la provisión de esta. Sin embargo, según la opinión de los vecinos entrevistados, ni las acciones de los vecinos en los Whatsapp[[16]](#endnote-17) ni la participación en los esquemas de alarmas comunitarias reciben sustantivo apoyo e involucramiento de los sujetos y de sus familias. En estas instancias participan pocos vecinos y en general los recién llegados a los barrios o los migrantes no están integrados a estas redes. Los vecinos explican que se teme ‘ser individualizado como el responsable que “alertó a la policía” generando un alto temor a las represalias.

*“aquí se usan las alarmas cuando hay partido o para citar a reunión con los vecinos” (Entrevista Dirigente Vecinal, Villa Oreste Plath, 14 de septiembre)*

En términos de prácticas asociativas y participativas, sólo en algunos sectores de la comuna, y especialmente en aquellos de carácter más antiguos y con mayor presencia de liderazgos vecinales fuertes se ha logrado organizar a grupos de personas, quienes han desarrollado verdaderas brigadas de vigilancia barrial. La densidad del tejido comunitario dada por la antigüedad, aparece como elemento decisivo para generar esta organización.

Y, por otra parte, en algunos barrios con alta incidencia de tráfico de drogas, se observa que determinados dirigentes vecinales han podido negociar con los narcotraficantes horarios, lugares específicos de ventas de droga o el no robo a vecinos, de manera de sacar los factores de peligro del interior de la comunidad.

*“(Los que venden dogas) es minoritario, pero tienen influencias. El 80% está con nosotros tratando de hacer cosas y sacando a los niños de entorno y hay un 20% mal, el presidente ampara el consumo y el tráfico, en su casa paran a vender” (Focus Group, Villa Las Torres, 15 de septiembre).*

En contraste a este involucramiento de los sujetos en instancias asociativas, las prácticas de segurización más extendidas en los barrios refieren a aquellas que se toman de manera individual y en los hogares. Rejas, alarmas, perros, cambiar sus rutinas, etc. son las soluciones más comunes que sujetos y familias implementan para responder a la sensación de inseguridad que les alberga. Un vecino al respecto agrega:

*“Nadie se siente seguro. Después de 40 años viviendo aquí tuve que comprar rejas porque intentaron entrar a mi casa y en 39 años nunca. (Focus Group, Villa Las Encinas, 9 de septiembre)*

La respuesta asociativa de los vecinos para proveer seguridad es escasa, pero en niveles similares a otras comunas de la zona, como muestra el siguiente gráfico.

INSERTAR GRÁFICO 3

Estos datos coinciden con las cifras que reporta la Encuesta Nacional de Victimización que muestra que, en 2013, 26,1% de los hogares en Chile tomó alguna medida para prevenir o protegerse de la delincuencia y con los datos que entrega el Informe de Seguridad del Instituto de Derechos Humanos de 2012 y que da cuenta del crecimiento de la industria de seguridad privada en Chile, la que –si se considera el número de guardias privados- se ha duplicado en las últimas décadas.

Si bien se podría pensar que estas respuestas individuales han estado siempre arraigadas entre los vecinos, emerge en los relatos sobre el pasado, una imagen de barrio en el cual

existía una base compartida de valoraciones culturales que generaban confianza y reciprocidad, además de permitir fijar expectativas en el otro, que aumentaban la seguridad.

*“…aquí había empleados particulares, otros de aviación, otros eran profesores...por eso te digo, era una diversidad de vecinos pero con un trabajo estable, muy estable…aquí teníamos hasta doctores, abogados…era una diversidad de vecinos y con buenos hábitos, hace como un año y medio que nos están dando rudo…en nuestro territorio, en nuestro mismo barrio había una banda, y todos sabemos que si, entonces no podemos decir que somos los mismos vecinos de antes, ahora ya no se puede confiar igual que antes. ..(Focus Group, Villa Gabriela Mistral, 24 de Septiembre)*

De esta forma, se puede sostener que si bien las políticas locales han fomentado y promovido los esquemas asociativos de segurización en los barrios, son las practicas individuales y asumidas por hogares y familias las que más extendidas se encuentran. Esto coincide con Dammert, 2010 quien destacan que la segurización en la vida cotidiana en Chile pasa más por prácticas individuales que aquellas que involucran a otros vecinos de los barrios.

*4. Tejido social y tráfico de drogas: desconfianzas interpersonales y la ‘nostalgia por la comunidad’*

Esta tendencia a la individualización de las respuestas frente a la inseguridad no se puede explicar solamente en relación a la crisis de confianza institucional antes descrita. Y es que tanto en materia de seguridad pública como en otros ámbitos de la gestión territorial de las políticas públicas en Chile se observan bajos niveles de involucramiento de los sujetos y familias en actividades asociativas y comunitarias. En Cerrillos, al igual que en otros contextos urbanos, existe una baja participación en asuntos e instituciones comunitarias[[17]](#endnote-18).

Según datos del año 2011, la comuna cuenta con 809 organizaciones comunitarias, siendo las principales las 69 Juntas de Vecinos (Reportes Estadísticos Comunales, 2013). Dentro de la oferta de organizaciones comunitarias destacan los talleres ofrecidos por el municipio, club de adulto mayor y centro de madres. Estas cifras no son muy diferentes a la realidad nacional, en donde de acuerdo a datos de la encuesta nacional de Caracterización socioeconómica de nivel comunal- CASEN, si para el año 2000 el 30.7% de la población declaraba participar en alguna organización, para el 2009, esta cifra cae al 20.1% (Herrmann & Van Klaverenn, 2015).

Por ello, la participación es una preocupación instalada desde la misma municipalidad, en donde se reconocen las dificultades para promoverla y eso mismo se nota en los datos de la CASEN 2013, en donde el 86,3% de los habitantes de la comuna no participa en ninguna organización.

*“Por otro lado, existe un gran desafío de representatividad en los habitantes de Cerrillos. Este tema se relaciona directamente con la escasa motivación de los vecinos por hacerse parte en los asuntos públicos. En el mismo sentido, hay un llamado de atención por parte de los dirigentes vecinales respecto a la casi nula injerencia que tienen las gestiones que ellos realizan en la toma de decisiones de los asuntos importantes de la comuna” (Pladeco 2011-2015:11)*

Esto es ratificado por los mismos vecinos, quienes consideran que siempre ‘son los mismos’ los que terminan participando en las instancias propuestas.

Relacionado a lo anterior, si se analizan los vínculos sociales existentes en los vecindarios y al tejido comunitario, el territorio se caracteriza por un deterioro y poco contacto entre vecinos. Así lo explicita un vecino de la comuna:

*“Las villas están separadas por un sector industrial, por ejemplo, yo no conocía a don Arturo, y no hay contacto” (Focus Group, Villa Las Encinas, 9 de septiembre)*

Esta falta de vínculos también se asocia a la desconfianza hacia al otro que manifiestan los entrevistados, en la medida que se constituye en “*alguien que nos puede desconocer*” o “constituye una amenaza, principalmente asociado a comportamientos disruptivos asociados al consumo de drogas.

*“La gente ha perdido la confianza, es mucha gente de la tercera edad, son los fundadores, la calle principal es pura gente adulta, pocos jóvenes. Ya esa gente desconfía y prefieren estar encerrados, porque cuando salen ven la delincuencia la gente joven perdida, el trago (Focus Group, Villa Los Presidentes, 25 de septiembre)*

Esta sensación de desconfianza se agudiza con la percepción que antiguos residentes de la comuna tienen en torno a los migrantes que viven en la comuna. Si bien la cantidad de población migrante es baja, tan solo un 0.3% de los habitantes de acuerdo a datos de la CASEN 2013, para los vecinos, la llegada de extranjeros se asocia al desarrollo de costumbres y valores muy diferentes a las propias y que son significadas de manera negativa. De hecho, al referirse a estas familias los vecinos hablan de ‘contaminación y de peligros’-

*… (Los migrantes) pasó en los colegios, en el consultorio, los barrios nuevos que se creaban venían a este sector y nosotros teníamos un hábito o un estándar de vida muy diferente a ellos y ellos empezaron a llegar por una necesidad digamos y nos empezaron a contaminar” (Focus Group, Villa Gabriela Mistral, 24 de septiembre)*

Estas opiniones de los habitantes de Cerrillos coinciden con las valoraciones que los chilenos entregan al otro desconocido. Según la última encuesta de cohesión social en Chile (2014), el 77.9% de los chilenos cree que no se puede confiar en el otro, y el 65.2% cree que los otros se van a aprovechar de mí. Esta desconfianza interpersonal da cuenta de una forma de relacionarse que pone en el otro el peligro y la amenaza.

Estas relaciones de desconfianza interpersonal se agudizan en aquellos territorios donde se despliegan un mayor número de actividades vinculadas al micro tráfico de drogas, fenómeno que es significado como una de las principales causas del deterioro de la vida comunitaria- según los vecinos.

*“(Moderador) La gente le tiene miedo al tráfico y a los traficantes?*

*(E1) Si porque si yo voy e intento hacer que los saquen, nos van a amenazar y se irán en contra nuestra y de la familia” (Focus Group, Villa Los Presidentes, 25 de septiembre)*

Frente a este contexto, los vecinos hablan con añoranza de un pasado que estuvo marcado por el conocimiento entre los vecinos y la vida en comunidad.

*“yo antes me dedicaba toda la tarde a jugar en mi cuadra con los amigos de mi edad, mi hija no puede ni siquiera puede ir a comprar sola…” (Focus Group, Villa Gabriela Mistral, 24 de septiembre)*

No obstante, en la práctica, la vida cotidiana se despliega en los ámbitos familiares y la casa se ha convertido en el espacio privilegiado de desarrollo, espacio que se configura como una fortaleza frente a amenazas y peligros instalados en pasajes, calles y espacios públicos de la comuna. En este contexto, es la privatización de la vida social y la reclusión al espacio privado la que mayoritariamente convoca a los vecinos de Cerrillos. La amenaza y el peligro se canalizan través del ‘extraño’ y de lo desconocido. Espacios públicos y urbanos aparecen como los portadores del peligro. Con ello el anhelo por la vida comunitaria no encuentra correlato con la experiencia cotidiana y definiciones que hacen los sujetos entrevistados.

*Conclusiones finales*

La política participativa de gestión y prevención del delito en Chile ha tenido un escaso alcance en relación a fortalecer el asociativismo durante las últimas dos décadas. En contraste a ello, el llamado que los gobiernos democráticos han hecho a la ciudadanía- en territorios como Cerrillos- para que participe en la provisión de la seguridad evidencia un mayor correlato en prácticas de carácter individual y defensivas de los hogares.

Esta respuesta frente a la inseguridad se enmarca en un contexto caracterizado por una profunda crisis de confianza ciudadana hacia las instituciones encargadas de proveer seguridad, el que es a su vez acompañado por los procesos de individuación y privatización de la vida social que ha fomentado el neoliberalismo en Chile. Esto se agudiza aún más, en barrios en los cuales vecinos están más expuestos al accionar de redes de tráfico de drogas, reforzándose el sentimiento de desconfianza hacia los otros. Y es que, el discurso de los vecinos entrevistados en este estudio y los datos estadísticos analizados, da cuenta que es frente a la ineficacia policial que vecinos deciden protegerse y las prácticas de seguridad remiten a una forma de negociación con el riesgo y resguardo del espacio privado. Estos resultados coinciden con aquellas investigaciones sobre la violencia urbana que destacan que el temor al delito lleva a que los sujetos se encierren en sus casas y sospechen de los vecinos, (Rotker, 2002) y que implementen estrategias de segurización en la vida cotidiana, sean estas defensivas (rejas, alarmas, perros, etc.) o evasivas (cambios de trayectos de desplazamientos o abandono de espacios públicos (Caldeira, 2002, Kessler, 2009). Para el caso chileno, estos resultados coinciden con Dammert (2010) quien señala que la mayoría de los santiaguinos implementan mayoritariamente este tipo de medidas de protección.

Sin embargo, lo que queda menos claro en las investigaciones realizadas en Chile, refiere al rol y responsabilidad que la ciudadanía le otorga al estado en esta materia. Como se ha señalado antes, diversos estudios que se inscriben en la escuela post estructuralista destacan que detrás de las diversas estrategias que despliega el estado en materia de seguridad, existe una racionalidad que busca el control del orden social por medio del gobierno de las conductas y de los cuerpos de los sujetos. Y es que, como destaca Ferguson y Gupta, “esta racionalidad – propia de sociedades de mercado en democracias occidentales- implica la transferencia de tareas que eran propias del estado a entidades no estatales, por medio de la fabricación de tecnologías que producen un mayor grado de autonomía de dichas entidades respecto al mismo estado. En este sentido, no se trata de que exista menos estado, sino que esta toma una forma de gobierno nueva. Esta nueva modalidad crea mecanismos que promueven el ‘hágalo usted mismo’ y fomenta mayor ‘responsabilidad ‘de los sujetos sobre sus propias condiciones de vida; sujetos que a su vez son empoderados para poder disciplinarse a sí mismos” (Ferguson & Gupta; 2002:989). Desde esta perspectiva, las estrategias de prevención del delito con participación de la ciudadanía constituyen una nueva cara del estado y una nueva forma de ejercer su soberanía (Garland, 1996). Destaca Lemke, que el gobierno bajo esta racionalidad, se define como el gobierno de las conductas y se ejerce tanto por medio del gobierno del sí mismo como del gobierno de los otros (Lemke, 2001). De esta forma, el llamado que hace el estado a la ciudadanía en materia de prevención constituye un enunciado que busca gobernar la inseguridad por medio de los sujetos y sus conductas, sin necesidad de ejercer explícitamente su capacidad coercitiva.

Para el caso analizado, la adopción de estas acciones por parte de los vecinos responde a un sentimiento de desprotección por la ineficacia policial (Caldeira, 2002), que refuerza la creencia y valoración social de que la solución de los problemas comunes depende más de los individuos que del estado.

Y es que, en Cerrillos, al igual que en el resto del país, la crítica al sistema de justicia criminal y a los actores locales a cargo de la prevención del delito, resaltan el discurso sobre la incapacidad de las instituciones estatales que no logran proveer ni de un marco institucional adecuado para la gestión del crimen, así como tampoco de un actuar cotidiano que permita hacer frente a las demandas de seguridad. Con ello, la racionalidad neoliberal existente detrás del discurso de la ‘co producción de la seguridad’ es desafiada por la demanda aún persistente que tienen sujetos en territorios más vulnerables respecto al rol que le corresponde al sistema de justicia criminal en la provisión de seguridad. En este sentido, las practicas seguritarias individuales en materia de seguridad responderían más que a una forma de introyección del mandato de la co responsabilidad, a una desesperanza adaptativa de los ciudadanos frente al sistema político institucional (PNUD, 2015). No obstante, ello refuerza la individuación y privatización que fomenta el neoliberalismo.

A través del caso estudiado, se evidencia la ambivalente subjetividad ciudadana que transita desde *el hacerse cargo individualmente de la seguridad* y l*a persistente creencia que la seguridad es un derecho que debe resguardar el estado.* Y es posible que esta percepción se agudice en territorios donde existe mayor vulnerabilidad socioeconómica y, por tanto, con mayor impacto negativo de los delitos y del tráfico de drogas. En este sentido, la demanda por mayor protección por parte del estado daría cuenta que en Chile las practicas neoliberales del control social – que fomentan la autoresponsabilidad- son dispersas y fragmentarias. Y es que como destaca Rose (2000), existe suficiente evidencia que muestra que aun cuando en las sociedades neoliberales los estados asumen un rol de promotor y facilitador de diversas tácticas de control, estos procesos se articulan de diversas formas, existiendo tendencias diversas e incluso contradictorias. Son los contextos específicos, los que producen formas particulares del gobierno del crimen en la ‘sociedad del control’ (Deleuze, 1995).

Por lo anterior es que la agenda participativa que se ha implementado en Chile y en otros países de Latinoamérica (como Colombia, Perú, Costa Rica y México) –hoy y tras dos décadas de implementación - debe y puede ser revisada. Se debe comprender que la participación comunitaria que promueve el estado para el control de la delincuencia se imbrica con los sentidos que las comunidades atribuyen al participar, a los mecanismos que poseen para involucrarse y a los vínculos reales que tienen con las instituciones en las que se apoyan.

Se debe tener claridad que en un contexto cultural de individuación de la vida cotidiana y de alta desconfianza, el alcance del asociativismo y del llamado a la comunidad en materia de seguridad se vincula más bien a una sociedad policial (cultura del control), que refuerza el debilitamiento de los tejidos comunitarios y amenaza la cohesión social en los territorios. Por ello, lo que la política de seguridad debe dar cuenta de a aquellas características y condiciones de contexto que dan contenido a ‘este llamado a la comunidad’ y en base a estas, repensar cómo se implementan.

Desde esta perspectiva, se debe atender que el compromiso e involucramiento de familias y sujetos en asuntos públicos son producto de procesos políticos, culturales y sociales propios de cada territorio. Ello implica comprender, que el control social del delito no es un producto de los regímenes neoliberales (que de hecho no lo es[[18]](#endnote-19)), sino que las formas que adquiere se imbrican con las lógicas y estructuras de individuación que el modelo involucra.

Como destaca Ferguson, 2009, la única posibilidad que existe de construir un modelo de centro izquierda es comprender al neoliberalismo no como un proyecto cerrado y no como una doctrina, sino más bien como una racionalidad que se apropia de diversas formas y que elabora subjetividades y produce determinados tipos de ciudadanías.

**Referencias Bibliográficas**

Bell, C.

2006 “Surveillance Strategies in Populations at Risk: Biopolitical Governances in Canada`s National Security Policy.” *Security Dialogue* 37 (2): 147-167.

Blanco, J., & Tudela, P.

2010 “Retos de la política pública para la participación ciudadana en la coproducción de la seguridad.” *Conceptos* 19: 1-17.

Borja, R.

2004 *Violencia y Seguridad ciudadana* Buenos Aires:Taurus.

Burgos, J., & Tudela, P.

2002 “Seguridad ciudadana en Chile: los desafíos de la participación y la modernización para una política pública” pp. 475-502 En Carrión, F. (ed.) *Seguridad ciudadana ¿espejismos o realidad?* Quito: Flacso Ecuador.

Caldeira, T.

2002. The paradox of police violence in democratic Brazil. *Ethnography*, 3(3): 235-263.

Carabineros de Chile

2011 *Plan Cuadrante de Seguridad Preventiva. Presentación para Seminario Internacional de Modelos y sistemas de control en seguridad Ciudadana*. Santiago de Chile, 5 de agosto 2011. En <http://www.munitel.cl/eventos/seminarios/html/documentos/2011/SEMINARIO_INTERNACIONAL_MODELOS_Y_SISTEMAS_DE_CONTROL_EN_SEGURIDAD_CIUDADANA_LOCAL_SANTIAGO/05.pdf>.

Centro de Estudios Longitudinales

2016 “Percepción del Servicio Defensoria Penal Pública” Santiago, 10 de febrero 2016 en http://www.encuestas.uc.cl/Documentos/Publicos/Archivos/PresentaciónDPP.pdf

Centro de Estudios Públicos

1990 *Estudio Social y de Opinión Pública*. Informe de Resultados. Septiembre Octubre 1990. En <http://www.cepchile.cl/estudio-social-y-de-opinion-publica-septiembre-octubre-1990/cep/2016-03-04/092747.html>

Centro de Estudios Públicos

2016 *Estudio Social y de Opinión Pública*. Informe de Resultados. Julio- Agosto 2016. En http://www.cepchile.cl/cep/site/artic/20160818/asocfile/20160818165239/encuestacep_julio_agosto2016.pdf

Dammert, L. y Lunecke, A.

2004 *La prevención del delito en Chile. Una visión desde la Comunidad*. Santiago: CESC, U de Chile.

Dammert, L.

2003 “Participación comunitaria en la prevención del delito en América Latina ¿De qué participación hablamos?” *Delito y sociedad: revista de ciencias sociales* 18:125-157.

Dammert, L.

2005 *Violencia criminal y seguridad ciudadana en Chile.* Santiago*:* United Nations Publications.

Dammert, L.

2010 *La encrucijada del temor: redefiniendo la relación entre Estado y ciudadanía en Chile*. Tesis doctoral: Leiden University.

Deleuze, G.

1995 “Proscript on control societies” En Deleuze, G. *Negotiations.* P. 177-82. New York: Columbia University Press.

Ferguson, J.

2009. The uses of neoliberalism. *Antipode*. Vol. 41N° S1.

Ferguson, J.; Gupta, A.

2002 “Spatializing states: toward an ethnography of neoliberal governmentality.” *American Ethonologist* 29(4): 981-1002.

Fundación Paz Ciudadana y Subsecretaría de Prevención del Delito.

2013. *Compendio de buenas prácticas de prevención del delito*. Santiago: Fundación Paz Ciudadana y la Subsecretaría

Fundación Paz Ciudadana

2016 *Informe de Victimización y Temor en Chile* Santiago: Fundación Paz Ciudanan.

Garland, D.

1996. The limits of the sovereignty of the state. Strategies of crime control in contemporary society. *British Journal of Criminology*.36 (4): 445-471.

Garland, D.

1999. *Castigo y sociedad moderna: un estudio de teoría social*. Buenos Aires: Siglo XXI.

Garland, D.

2000. The culture of high crime societies. *British journal of criminology*, 40(3):347-375.

Garland, D.

2005. *La cultura del control*. Gedisa: Barcelona.

Hale, Ch.

2005 “Neoliberal multiculturalism: the remaking of cultural rights and racial dominance in Central America.” *PoLAR* 28 (1): 10-28

Herrmann, G; Van Klaveren, A.

2015 “Disminución de la participación de la población en organizaciones sociales durante los últimos trece años en Chile e implicaciones para la construcción de una política de planificación urbana más participativa” *Eure* 42(125): 175-203.

Johnston, L.

2001. Crime, fear and civil policing. *Urban Studies*, 38(5-6):959-976.

Kessler, G.

2009*. El Sentimiento de Inseguridad*: Sociología del temor al delito. Buenos Aires: Siglo XXI,

Larner, W.

2000. Neo- liberalism: Policy, Ideology y Governmentality.

*Studies in Political Economy* 63(1): 5-25

Lee, M.

2007. *Inventing Fear of Crime. Criminology and the politics of anxiety*. New York:Willian Publishing.

Leiva, F.

2008 *Latin American Neostructuralism: The Contradictions of Post-Neoliberal Development*. Minneapolis: University of Minnesota Press.

Lemke, T.

2001 “The birth of bio-politics’: Foucault´s lecture at the colleges de France on neoliberal governmentality”. *Economy and Society* 30(2):190-207.

### Libertad y Desarrollo

2015 “Encuesta de victimización ENUSC 2014: preocupante estancamiento” *Temas Públicos* 1203 (Abril)

### Lunecke, A.

2014 *El “super hávit de tecnocracia” y el “déficit de ‘Política’”: El desarrollo de las políticas de seguridad ciudadana en Chile*. Santiago: Informe para Asuntos Públicos.org. Acceso online en: [http://www.asuntospublicos.cl](http://www.asuntospublicos.cl/)

Ministerio de Desarrollo Social

2013 “Encuesta de Caracterización Socioeconómica- CASEN” en http://observatorio.ministeriodesarrollosocial.gob.cl/casen-multidimensional/casen/casen_2013.php

O´Malley, P.; Hutchinson, S.

2007. Reinventing Prevention. Why did crime prevention develop so Late?

*British Journal of Criminology* 47:373-389.

O'Malley, P., & Hutchinson, S.

2007 “Reinventing Prevention Why Did ‘Crime Prevention’ Develop So Late?”

*British Journal of Criminology*, 47(3):373-389.

Política Nacional de Seguridad Ciudadana,

2004*. Política Nacional de Seguridad Ciudadana.* Santiago: Mimeo.

Programa de Desarrollo Humano de Naciones Unidas

2013. *Informe Regional de Desarrollo Humano 2013-2014. Seguridad Ciudadana con rostro humano: diagnóstico y propuestas para América Latina*. En: [http://www.latinamerica.undp.org](http://www.latinamerica.undp.org/)

Rose, N.

2000. Government and control. *Bristish Journal of Criminology* 40:321-339.

Programa de Desarrollo Humano de Naciones Unidas

2015. *Desarrollo Humano en Chile. Los tiempos de la Politización.* Santiago: PNUD.

Rotker, S.

2001. *Ciudadanías del miedo*. Buenos Aires: Nueva Sociedad.

Sandoval, L.

2001. “Prevención local de la delincuencia en Santiago de Chile”. En: Fruhling, H. y Candina, A. (ed). *Polícía, Sociedad y Estado: Modernizacion y Reforma Policial en América del sur*. Santiago:CED.

Slater, D. y Tonkiss, F.

2001 *Market society*. Cambridge: Blackwell Publishers.

Sozzo, M.

2000 “Seguridad urbana y tácticas de Prevención del delito” *Cuadernos de jurisprudencia y doctrina penal* 10:130-136.

Sozzo, M.

2009 “Populismo punitivo, proyecto normalizador y “prisión-depósito” en Argentina.” *Sistema Penal & Violência,* 1(1):33-55*.*

United Nation Office on Drugs and Crime

2013 *Informe Mundial sobre las Drogas.* New York: United Nation

Wormald, G., Flores, C., Sabatini, F., Trebilcock, M., & Rasse Figueroa, A.

2012. Cultura de cohesión e integración en las ciudades chilenas*. Revista INVI,* 27(76), 117-145.

1. La configuración de la sociedad chilena como una sociedad neoliberal da cuenta del rol del mercado y su capacidad de estructurar una realidad social en la cual esta institución no sólo cobra centralidad como ente generalizado de intercambio y asignación de recursos, sino también como fundamento de coordinación y valoración social (Slater y Tonkiss; 2001). Esto desata procesos complejos que se articulan en base al interés individual y la competencia. Esto implica un refuerzo de los procesos de individuación y diferenciación social. Como consecuencia de lo anterior, se van generando nuevas valoraciones sociales tipificadas por el esfuerzo y la iniciativa personal; la valoración dineraria e instrumental de las relaciones sociales y el reforzamiento de las estrategias individuales de movilidad social (Wormald et al., 2012) [↑](#endnote-ref-2)
2. Así, por ejemplo, estudios muestran que el aumento del gasto en las policias se incrementó en alrededor de un 35% entre 2010 y 2015 (Libertad y Desarrollo, 2015) [↑](#endnote-ref-3)
3. Otros esfuerzos que ejemplifican esta trayectoria refieren por ejemplo a los impulsados en el ámbito urbano, por ejemplo, a través de la participación ciudadana en el diseño de planes reguladores comunales (PRC), o en los planes de desarrollo comunal (Pladecos); o en iniciativas orientadas a renovación de barrios (Programas del Ministerio de Vivienda y Urbanismo) y lo que estipula la actual Política Nacional de Desarrollo Urbano (PNDR). También destacan los esfuerzos que se han realizado en salud, educación, cultura, medio ambiente y otros ámbitos sectoriales de la gestión pública. [↑](#endnote-ref-4)
4. Las alarmas comunitarias son esquemas de vigilancia barrial a nivel de calles o pasajes en los cuales los vecinos se organizan para poner dispositivos de alerta (botones de pánico) en sus hogares y que son activados frente a amenazas o peligros. Cada hogar recibe por parte del municipio un botón de pánico que activa una sirena que suena en la calle. Así los otros vecinos se ponen en alerta y son avisados de que algo sucede en el vecindario y en un hogar determinado. El objetivo es disuadir a los delincuentes de cometer el ilícito. [↑](#endnote-ref-5)
5. Las barras bravas son grupos de seguidores asociados a los equipos de futbol en Chile. Siendo los principales equipos el Colo Colo, La Universidad de Chile y la Universidad Católica. La ‘garra blanca’ es el nombre que reciben los hinchas del equipo Colo Colo y ‘la u’, es el nombre asociado a la Universidad de Chile. [↑](#endnote-ref-6)
6. En octubre de 2015 fue aprobada por el parlamento la Ley de Consejos comunales de seguridad pública, ley que obliga a los municipios a implementar planes locales de prevención del delito. Esta ley constituyó un cambio a la Ley Orgánica de Municipalidades, la que hasta dicha fecha no contemplaba un rol activo de los municipios en esta materia. [↑](#endnote-ref-7)
7. Este programa depende de la Subsecretaría de Prevención del Delito y tiene como objetivo “disminuir la victimización por delitos, violencia interpersonal (violencia comunitaria, violencia escolar y violencia entre grupos de niños, niñas, adolescentes y jóvenes en los espacios públicos), percepción de inseguridad y actividades asociadas al tráfico de drogas en barrios focalizados por su nivel de victimización, delitos y/o por la concentración espacial de residencias de sujetos involucrados en acciones ilícitas “ [↑](#endnote-ref-8)
8. El programa Senda Previene tiene como objetivo generar actividades de prevención y rehabilitación en el consumo de drogas, tabaco y alcohol a nivel local. [↑](#endnote-ref-9)
9. La Unidad de Justicia Vecinal busca gestionar problemas de incivilidades y convivencia entre vecinos. [↑](#endnote-ref-10)
10. Este programa depende del Ministerio de Vivienda y se enfoca en la intervención mediante participación local en barrios vulnerables. [↑](#endnote-ref-11)
11. Este es un programa intersectorial entre la Subsecretaria de Carabineros, El SENAME y la Subsecretaria de Prevención del Delito, que busca la atención psicosocial de niños y adolescentes ingresados a comisarías. [↑](#endnote-ref-12)
12. Las OPD son organismos ambulatorios que operan a nivel local y buscan garantizar la protección integral de niños y adolescentes frente a condiciones de maltrato y abuso. [↑](#endnote-ref-13)
13. Las alarmas comunitarias son dispositivos que se localizan en diferentes barrios a los que están conectados varios vecinos y que sirven para alertar sobre hechos delictuales. [↑](#endnote-ref-14)
14. Cabe señalar que en Chile existen dos cuerpos policiales unificados y de carácter nacional: la policía de Carabineros que constituye a la policía uniformada y que tiene carácter militar; y la Policía de Investigaciones (PDI) cuya principal labor es la investigación policial. Ambas policías dependen desde el año 2011 del Ministerio de Interior de Chile. [↑](#endnote-ref-15)
15. Datos de la misma encuesta confirman esta desconfianza. En una escala de 1 a 7 en la que 1 es nada de confianza y 7 total confianza, los ciudadanos evalúan con un 3,6 al Ministerio de Justicia, 3,9 a los Tribunales de Justicia y 4,9 a la Policía (Carabineros) [↑](#endnote-ref-16)
16. En Chile es extendido el uso de la telefonía celular y la aplicación tecnológica Whatsapp. Uno de los usos más comunes que recibe esta tecnología refiere a la creación de grupos de vecinos de calles o pasajes que se coordinan para alertar, vigilar y proteger sus hogares y vecindarios frente a amenazas delictuales. [↑](#endnote-ref-17)
17. A los 16 años de dictadura militar que tuvo el país –y que fueron clave en la desarticulación de las organizaciones sociales de participación- se suma que desde 1996 tuvo alcaldes de centro y derecha que no promovieron la participación comunitaria. De hecho, el actual alcalde recalca que parte de su trabajo ha tenido que ver con fortalecer las organizaciones vecinales. [↑](#endnote-ref-18)
18. Un ejemplo de ello es lo que sucede en el caso de las comunidades indígenas, las que mediante procesos de participación han logrado generar políticas legítimas de regulación de la violencia en sus comunidades (Borja, 2004) [↑](#endnote-ref-19)
